# Supplementary material for: Geometric control of human stem cell morphology and differentiation
Source: Royal Society of Chemistry journal article supplement (doi:10.1039/c0ib00016g), 2010-01-01
Supplement: c0ib00016g.pdf [file c0ib00016g.pdf]

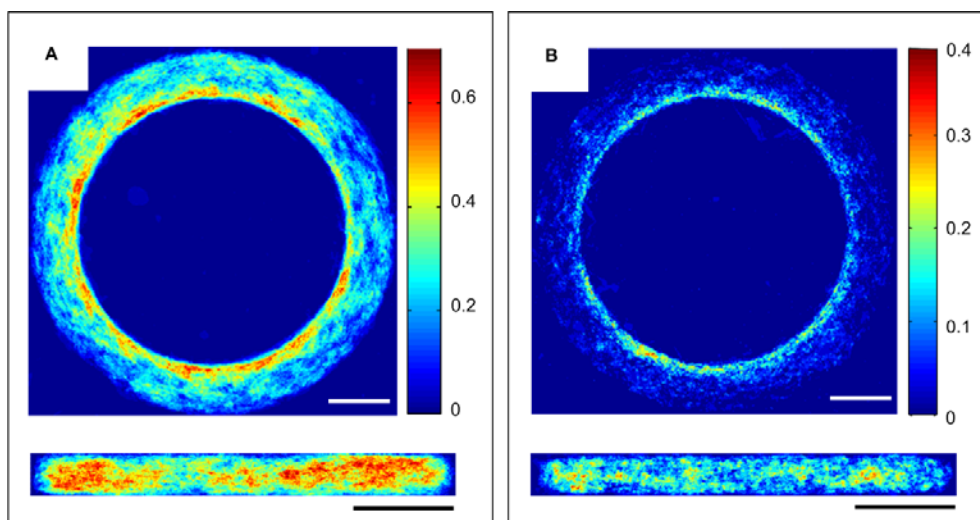

**Fig S1.** Frequency maps of osteogenic differentiation (A) and adipogenic differentiation (B) of human adipose-derived stem cells (hASCs) in 1:1 mixture of osteogenic and adipogenic media for 4 days. At the top are cells on rings with an inner diameter of 1000 $\mu$ m and a width of 200  $\mu$ m, and the bottom rectangles are 1000 $\mu$ m in length and 100 $\mu$ m in width. Scale bars: 200  $\mu$ m.

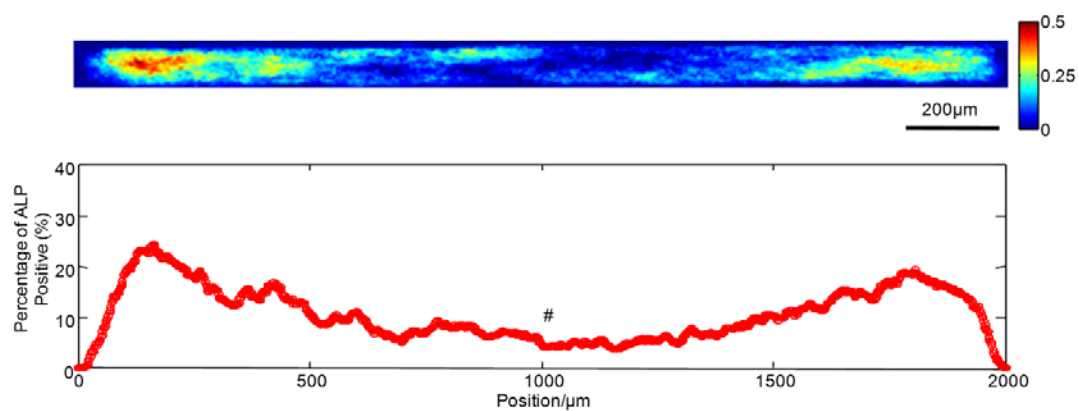

**Fig S2.** Alkaline phosphatase activity (ALP) of human adipose-derived stem cells (hASCs) on rectangles (2,000x100 μm) in osteogenic differentiation medium for 3 days. At the top is the frequency map and the corresponding average ALP activity along the length of each pattern is shown at the bottom. (# significantly different from the peak ALP near two ends in the same rectangle)
